# Supplementary material for: The low spin CoII fragment with homoleptic 1,10-phenanthroline ligands: synthesis, structures, DFT investigations, and magnetic properties
Source: Royal Society of Chemistry journal article supplement (doi:10.1039/c0dt01640c), 2011-01-01
Supplement: c0dt01640c.pdf [file c0dt01640c.pdf]

# The Low Spin $\text{Co}^{\text{II}}$ Fragment with Homoleptic 1, 10-Phenanthroline Ligands: Synthesis, Structures, Magnetic Properties, and DFT Investigations

Bo Li, Jingping Zhang,\* Xue Yong, Wenliang Li, Yiyang Zheng

*Faculty of Chemistry, Northeast Normal University, Changchun 130024, China.*

\*e-mail: [zhangjingping66@yahoo.cn](mailto:zhangjingping66@yahoo.cn)

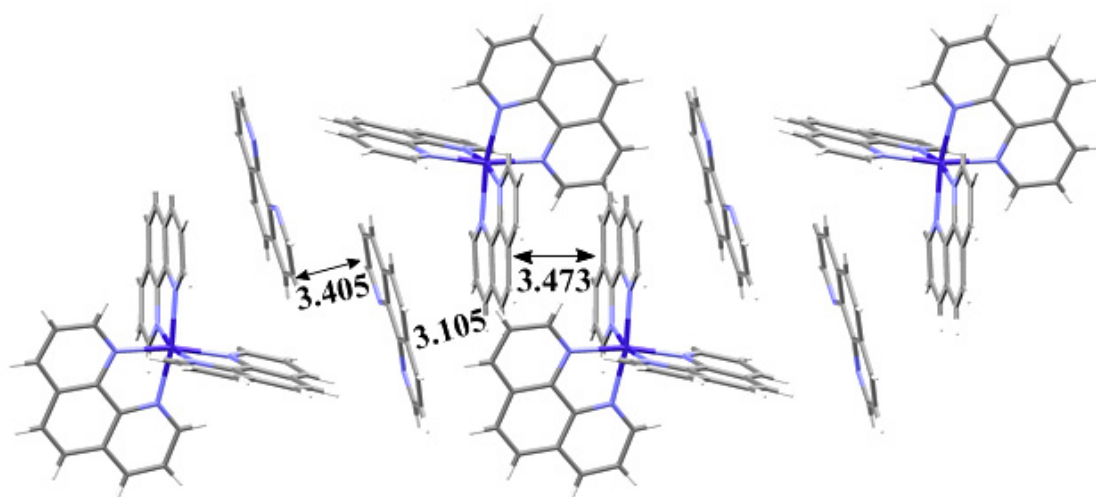

**Fig. S1.** Continuous  $\pi$ - $\pi$  interactions between  $[\text{Co}(\text{phen})_3]^{2+}$  cations and phen molecules in crystallographic  $bc$  plane.

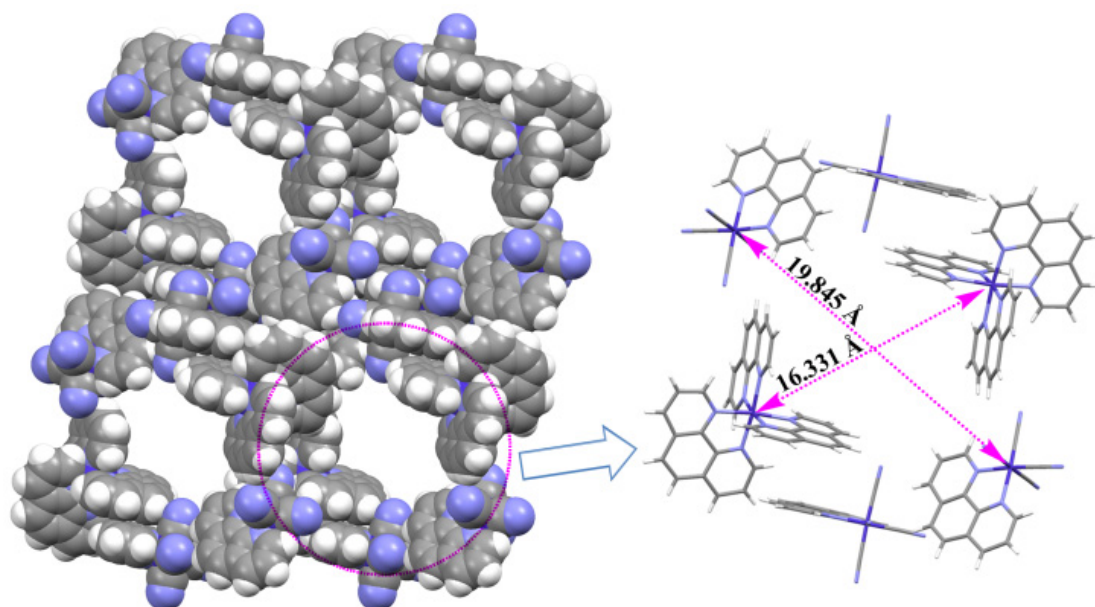

**Fig. S2.** The space-filling diagram of unoccupied cavities in the view of crystallographic *a* axis and the detail cavity structure of **1** with the diagonal distances of the void being ca. 16.331 Å and 19.845 Å.

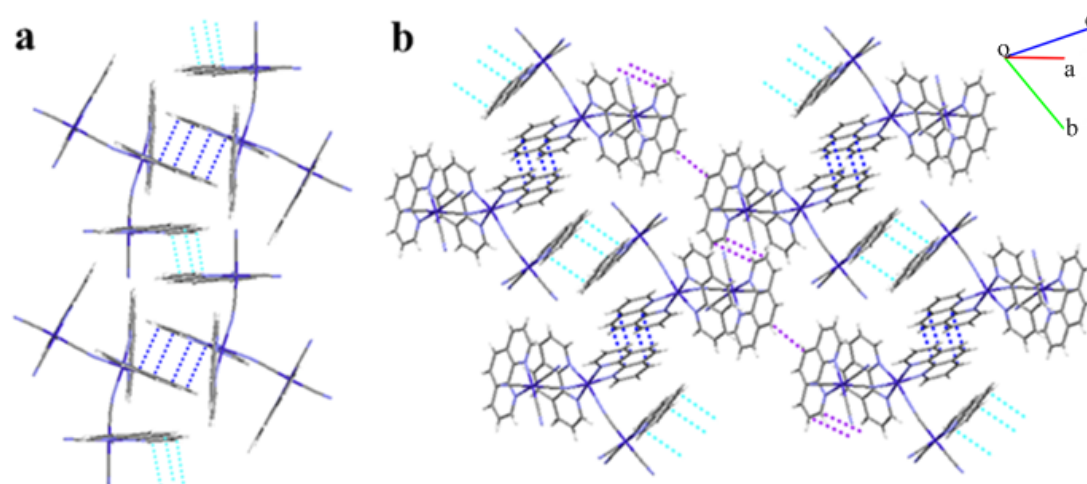

**Fig. S3.** (a) The plot of the 1D chain formed by the dimer with  $\pi$ - $\pi$  interactions for **2**. (b) View of the 2D structure of complex **2**. (Blue dashed lines,  $\pi$ - $\pi$  interactions within the dimer; cyan ones,  $\pi$ - $\pi$  interactions of neighboring dimers; the purple ones, the supramolecular interactions for the formation of the 2D plane.)

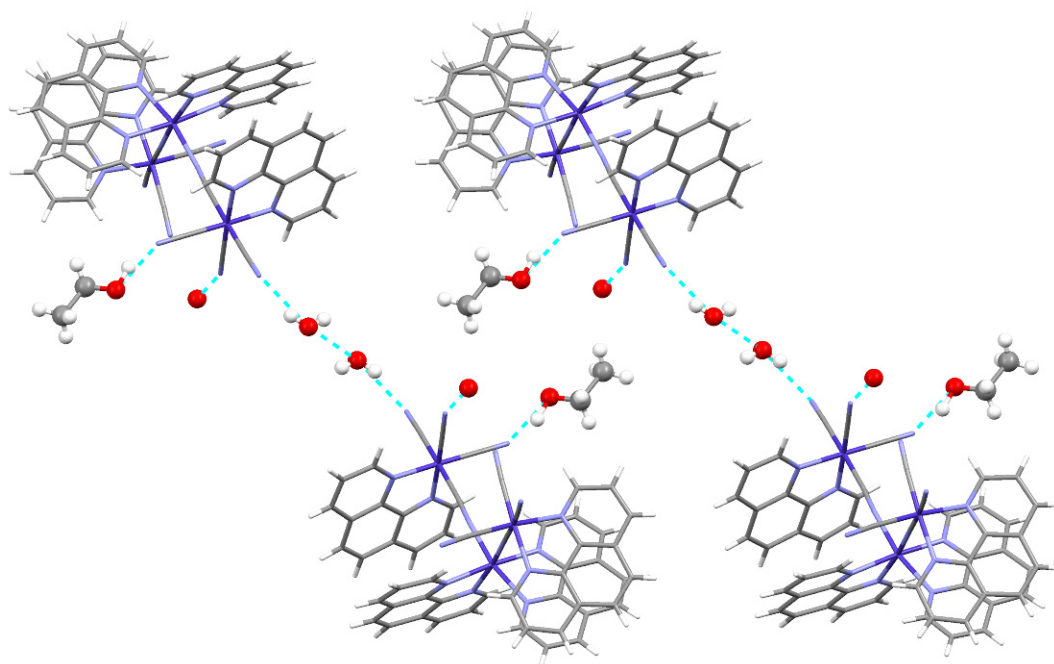

**Fig. S4.** The supramolecular structure of **2** viewed along a axis.

**Table S1.** Selected bond distances (Å) and bond angles (°) for **complex 1**.

|                   |           |                   |           |
|-------------------|-----------|-------------------|-----------|
| Co(1)-N(13)       | 2.044(5)  | C(2)-Co(2)-C(4)   | 90.2(2)   |
| Co(1)-N(11)       | 2.063(5)  | C(3)-Co(2)-C(4)   | 88.6(2)   |
| Co(1)-N(12)       | 2.070(5)  | C(1)-Co(2)-C(4)   | 176.3(2)  |
| Co(1)-N(10)       | 2.074(4)  | C(2)-Co(2)-N(15)  | 93.7(2)   |
| Co(1)-N(14)       | 2.078(6)  | C(3)-Co(2)-N(15)  | 175.8(2)  |
| Co(1)-N(9)        | 2.088(4)  | C(1)-Co(2)-N(15)  | 91.7(2)   |
| Co(2)-C(2)        | 1.862(6)  | N(10)-Co(1)-N(9)  | 79.54(18) |
| Co(2)-C(3)        | 1.867(6)  | N(14)-Co(1)-N(9)  | 96.41(19) |
| Co(2)-C(1)        | 1.896(7)  | C(2)-Co(2)-C(3)   | 90.5(2)   |
| Co(2)-C(4)        | 1.902(6)  | C(2)-Co(2)-C(1)   | 87.5(2)   |
| Co(2)-N(15)       | 1.974(4)  | C(4)-Co(2)-N(15)  | 91.4(2)   |
| Co(2)-N(16)       | 1.977(4)  | C(2)-Co(2)-N(16)  | 175.8(2)  |
| Co(3)-C(7)        | 1.859(6)  | C(3)-Co(2)-N(16)  | 93.3(2)   |
| Co(3)-C(5)        | 1.877(6)  | C(1)-Co(2)-N(16)  | 91.0(2)   |
| Co(3)-C(8)        | 1.910(7)  | C(4)-Co(2)-N(16)  | 91.5(2)   |
| Co(3)-C(6)        | 1.931(7)  | N(15)-Co(2)-N(16) | 82.49(18) |
| Co(3)-N(17)       | 1.958(4)  | C(7)-Co(3)-C(5)   | 90.5(2)   |
| Co(3)-N(18)       | 1.966(4)  | C(7)-Co(3)-C(8)   | 89.6(2)   |
| N(13)-Co(1)-N(11) | 94.7(2)   | C(5)-Co(3)-C(8)   | 87.5(2)   |
| N(13)-Co(1)-N(12) | 97.39(18) | C(7)-Co(3)-C(6)   | 87.1(2)   |
| N(11)-Co(1)-N(12) | 79.3(2)   | C(5)-Co(3)-C(6)   | 90.6(2)   |

|                   |            |                   |           |
|-------------------|------------|-------------------|-----------|
| N(13)-Co(1)-N(10) | 168.5(2)   | C(8)-Co(3)-C(6)   | 176.2(3)  |
| N(11)-Co(1)-N(10) | 93.32(17)  | C(7)-Co(3)-N(17)  | 92.9(2)   |
| N(12)-Co(1)-N(10) | 92.14(18)  | C(5)-Co(3)-N(17)  | 176.6(2)  |
| N(13)-Co(1)-N(14) | 80.2(2)    | C(8)-Co(3)-N(17)  | 92.6(2)   |
| N(11)-Co(1)-N(14) | 169.5(2)   | C(6)-Co(3)-N(17)  | 89.5(2)   |
| N(12)-Co(1)-N(14) | 92.1(2)    | C(7)-Co(3)-N(18)  | 176.2(2)  |
| N(10)-Co(1)-N(14) | 93.2(2)    | C(5)-Co(3)-N(18)  | 93.3(2)   |
| N(13)-Co(1)-N(9)  | 91.85(18)  | C(8)-Co(3)-N(18)  | 90.7(2)   |
| N(11)-Co(1)-N(9)  | 92.93(18)  | C(6)-Co(3)-N(18)  | 92.7(2)   |
| N(12)-Co(1)-N(9)  | 168.37(17) | N(17)-Co(3)-N(18) | 83.26(18) |

**Table S2. Selected bond distances (Å) and bond angles (°) for complex 2.**

|                  |            |                   |            |
|------------------|------------|-------------------|------------|
| Co(1)-C(2)       | 1.878(4)   | N(9)-Co(1)-N(10)  | 83.40(11)  |
| Co(1)-C(3)       | 1.878(4)   | N(8)-Co(2)-N(4)   | 91.28(10)  |
| Co(1)-C(1)       | 1.900(3)   | N(8)-Co(2)-N(13)  | 96.22(10)  |
| Co(1)-C(4)       | 1.903(3)   | N(4)-Co(2)-N(13)  | 92.11(10)  |
| Co(1)-N(9)       | 1.968(3)   | N(8)-Co(2)-N(12)  | 168.75(10) |
| Co(1)-N(10)      | 1.971(3)   | N(4)-Co(2)-N(12)  | 90.04(10)  |
| Co(2)-N(8)       | 2.080(3)   | N(13)-Co(2)-N(12) | 94.89(10)  |
| Co(2)-N(4)       | 2.097(3)   | N(8)-Co(2)-N(11)  | 91.62(10)  |
| Co(2)-N(13)      | 2.138(3)   | N(4)-Co(2)-N(11)  | 89.98(10)  |
| Co(2)-N(12)      | 2.142(3)   | N(13)-Co(2)-N(11) | 171.83(10) |
| Co(2)-N(11)      | 2.158(3)   | N(12)-Co(2)-N(11) | 77.21(10)  |
| Co(2)-N(14)      | 2.159(3)   | N(8)-Co(2)-N(14)  | 83.30(10)  |
| Co(3)-C(7)       | 1.870(3)   | N(4)-Co(2)-N(14)  | 167.79(10) |
| Co(3)-C(6)       | 1.876(4)   | N(13)-Co(2)-N(14) | 77.68(9)   |
| Co(3)-C(8)       | 1.894(3)   | N(12)-Co(2)-N(14) | 97.41(9)   |
| Co(3)-C(5)       | 1.910(4)   | N(11)-Co(2)-N(14) | 101.07(9)  |
| Co(3)-N(15)      | 1.968(2)   | C(7)-Co(3)-C(6)   | 91.01(14)  |
| Co(3)-N(16)      | 1.981(3)   | C(7)-Co(3)-C(8)   | 87.21(13)  |
| C(2)-Co(1)-C(3)  | 88.39(14)  | C(6)-Co(3)-C(8)   | 90.16(13)  |
| C(2)-Co(1)-C(1)  | 90.99(14)  | C(7)-Co(3)-C(5)   | 91.54(14)  |
| C(3)-Co(1)-C(1)  | 90.15(14)  | C(6)-Co(3)-C(5)   | 87.39(15)  |
| C(2)-Co(1)-C(4)  | 91.68(13)  | C(8)-Co(3)-C(5)   | 177.24(14) |
| C(3)-Co(1)-C(4)  | 89.85(14)  | C(7)-Co(3)-N(15)  | 174.62(12) |
| C(1)-Co(1)-C(4)  | 177.32(14) | C(6)-Co(3)-N(15)  | 93.81(12)  |
| C(2)-Co(1)-N(9)  | 94.01(12)  | C(8)-Co(3)-N(15)  | 90.39(11)  |
| C(3)-Co(1)-N(9)  | 177.56(13) | C(5)-Co(3)-N(15)  | 91.06(12)  |
| C(1)-Co(1)-N(9)  | 89.36(12)  | C(7)-Co(3)-N(16)  | 92.20(13)  |
| C(4)-Co(1)-N(9)  | 90.53(11)  | C(6)-Co(3)-N(16)  | 176.79(12) |
| C(2)-Co(1)-N(10) | 177.10(13) | C(8)-Co(3)-N(16)  | 89.84(11)  |

|                  |           |                   |           |
|------------------|-----------|-------------------|-----------|
| C(3)-Co(1)-N(10) | 94.21(13) | C(5)-Co(3)-N(16)  | 92.67(13) |
| C(1)-Co(1)-N(10) | 90.29(12) | N(15)-Co(3)-N(16) | 82.98(10) |
| C(4)-Co(1)-N(10) | 87.04(12) |                   |           |

**Table S3. Molecular orbital energy gaps between LUMO and SOMO ( $\Delta E_{\text{LUMO-SOMO}}$ ) for the solo LS  $[\text{Co}^{\text{II}}(\text{phen})_3]^{2+}$  cation (LSC) and the one with its nearest neighbour  $[\text{Co}^{\text{III}}(\text{phen})(\text{CN})_4]^-$  anion (LSSF) provided by different methods (in eV).**

|             | <b>BP86</b>  | <b>BPW91</b> | <b>B3LYP</b> |
|-------------|--------------|--------------|--------------|
| <b>LSC</b>  | <b>0.232</b> | <b>0.244</b> | <b>2.249</b> |
| <b>LSSF</b> | <b>0.241</b> | <b>0.249</b> | <b>2.676</b> |
